# Supplementary material
Source: PubMed Central journal article supplement (PMC5951032)
Supplement: 254_supplemental_Material.pdf [file 254_supplemental_Material.pdf]

## Supplementary

Table S1: Patient summary of sex, age, BW, and BMI. For further patient characteristics see Ranjan *et al.* [25].

| Patient | Sex | Age<br>[Years] | BW<br>[kg] | BMI<br>[kg/m <sup>2</sup> ] |
|---------|-----|----------------|------------|-----------------------------|
| 1       | F   | 52             | 54         | 22.8                        |
| 2       | F   | 64             | 50         | 20.0                        |
| 3       | M   | 48             | 81         | 24.5                        |
| 4       | F   | 31             | 69         | 24.2                        |
| 5       | M   | 35             | 87         | 25.4                        |
| 6       | M   | 58             | 72         | 23.8                        |
| 7       | F   | 19             | 73         | 25.3                        |
| 8       | F   | 45             | 59         | 20.9                        |

Table S2: Prior distributions of insulin PK and glucose PD model parameters with mean, 95% CI, and references.

| Parameter  | Mean<br>(95% CI) | Distribution                                  | Reference                                                                     |
|------------|------------------|-----------------------------------------------|-------------------------------------------------------------------------------|
| $t_{max}$  | 51 (32-70)       | $t_{max} \sim \mathcal{N}(51, 9.5)$           | SD changed from 19 [28] due to PK reported in [34]                            |
| $Cl_{F,I}$ | 18.9 (14.0-25.5) | $\log(Cl_{F,I}) \sim \mathcal{N}(2.94, 0.15)$ | [28]                                                                          |
| $E_{max}$  | 60 (30-90)       | $E_{max} \sim \mathcal{N}(60, 15)$            | Derived from [22]                                                             |
| $C_{E50}$  | 338 (168-508)    | $C_{E50} \sim \mathcal{N}(338, 85)$           | Derived from [22]                                                             |
| $F_{01}$   | 15.7 (11.4-20.0) | $F_{01} \sim \mathcal{N}(15.7, 2.1)$          | Mean changed from 9.7 [29] due to explicit inclusion of $G_{GNG}$ in PD model |

|                    |                |                                             |      |
|--------------------|----------------|---------------------------------------------|------|
| $k_{I2} * 10^{-4}$ | 595 (236-1502) | $\log(k_{I2}) \sim \mathcal{N}(-2.8, 0.46)$ | [29] |
| $k_{a1} * 10^{-4}$ | 34 (3.6-316)   | $\log(k_{a1}) \sim \mathcal{N}(-5.7, 1.1)$  | [29] |
| $k_{a2} * 10^{-4}$ | 555 (137-2252) | $\log(k_{a2}) \sim \mathcal{N}(-2.9, 0.70)$ | [29] |
| $k_{a3} * 10^{-4}$ | 237 (51-1098)  | $\log(k_{a3}) \sim \mathcal{N}(-3.7, 0.77)$ | [29] |
| $S_D * 10^{-4}$    | 5 (0.5-53)     | $\log(S_D) \sim \mathcal{N}(-7.6, 1.2)$     | [29] |
| $S_E * 10^{-4}$    | 412 (72-2357)  | $\log(S_E) \sim \mathcal{N}(-3.2, 0.87)$    | [29] |
| $S_T * 10^{-4}$    | 42 (10-179)    | $\log(S_T) \sim \mathcal{N}(-5.5, 0.73)$    | [29] |

Table S3: Comparison of PD model parameters estimated during leave-one-out validation and final PD model parameters for patient 1.

| Training Data | Test Data | Accept? | $C_{E50}$        | $E_{max}$           | $F_{01}$            | $k_{12} * 10^{-4}$ | $k_{a1} * 10^{-4}$ | $k_{a2} * 10^{-4}$ | $k_{a3} * 10^{-4}$ | $S_D * 10^{-4}$  | $S_E * 10^{-4}$ | $S_I * 10^{-4}$ |
|---------------|-----------|---------|------------------|---------------------|---------------------|--------------------|--------------------|--------------------|--------------------|------------------|-----------------|-----------------|
| BCD           | A         | N       | 329              | 70.6                | 12.0                | 288                | 31                 | 408                | 83                 | 7.2              | 286             | 31              |
| ACD           | B         | Y       | 407              | 65.7                | 11.8                | 276                | 39                 | 555                | 198                | 5.1              | 287             | 31              |
| ABD           | C         | N       | 436              | 56.4                | 14.2                | 244                | 16                 | 522                | 215                | 1.5              | 155             | 23              |
| ABC           | D         | N       | 266              | 87.1                | 11.6                | 241                | 42                 | 531                | 58                 | 5.6              | 508             | 30              |
| BD            | A         | Y       | 431              | 57.5                | 14.9                | 263                | 15                 | 510                | 192                | 1.5              | 136             | 22              |
| AD            | B         | Y       | 488              | 54.7                | 13.8                | 227                | 16                 | 502                | 242                | 1.4              | 173             | 19              |
| AB            | D         | N       | 394              | 66.2                | 14.3                | 236                | 28                 | 554                | 218                | 1.6              | 207             | 24              |
| ABD           | ABD       | 3/3     | 436<br>(355-517) | 56.4<br>(51.1-61.8) | 14.2<br>(12.9-15.5) | 244<br>(181-330)   | 16<br>(7-35)       | 522<br>(221-1233)  | 215<br>(59-778)    | 1.5<br>(0.6-3.3) | 155<br>(83-289) | 23<br>(16-31)   |

Table S4: Comparison of PD model parameters estimated during leave-one-out validation and final PD model parameters for patient 2. \*Visit A did not have MPE and MAPE values less than  $\pm 15\%$  and  $20\%$ , respectively.

| Training Data | Test Data | Accept? | $C_{E50}$        | $E_{max}$           | $F_{0I}$            | $k_{12} \cdot 10^{-4}$ | $k_{a1} \cdot 10^{-4}$ | $k_{a2} \cdot 10^{-4}$ | $k_{a3} \cdot 10^{-4}$ | $S_D \cdot 10^{-4}$ | $S_E \cdot 10^{-4}$ | $S_T \cdot 10^{-4}$ |
|---------------|-----------|---------|------------------|---------------------|---------------------|------------------------|------------------------|------------------------|------------------------|---------------------|---------------------|---------------------|
| BCD           | A         | N       | 452              | 68.0                | 13.2                | 246                    | 14                     | 456                    | 235                    | 1.2                 | 380                 | 16                  |
| ACD           | B         | N       | 413              | 81.6                | 13.7                | 367                    | 41                     | 517                    | 119                    | 2.9                 | 434                 | 26                  |
| ABD           | C         | Y       | 416              | 60.1                | 13.9                | 283                    | 12                     | 507                    | 277                    | 0.8                 | 201                 | 19                  |
| ABC           | D         | Y       | 426              | 68.6                | 14.4                | 317                    | 15                     | 512                    | 180                    | 0.8                 | 204                 | 21                  |
| ABCD          | ABCD      | 3/4*    | 405<br>(339-471) | 67.4<br>(59.3-75.5) | 13.8<br>(12.8-14.7) | 285<br>(223-363)       | 15<br>(7-35)           | 495<br>(236-1039)      | 231<br>(137-389)       | 1.2<br>(0.6-2.3)    | 334<br>(232-481)    | 19<br>(15-25)       |

Table S5: Comparison of PD model parameters estimated during leave-one-out validation and final PD model parameters for patient 3.

| Training Data | Test Data | Accept? | $C_{E50}$        | $E_{max}$           | $F_{01}$            | $k_{12} * 10^{-4}$ | $k_{a1} * 10^{-4}$ | $k_{a2} * 10^{-4}$ | $k_{a3} * 10^{-4}$ | $S_D * 10^{-4}$  | $S_E * 10^{-4}$  | $S_T * 10^{-4}$ |
|---------------|-----------|---------|------------------|---------------------|---------------------|--------------------|--------------------|--------------------|--------------------|------------------|------------------|-----------------|
| BCD           | A         | Y       | 414              | 55.3                | 15.3                | 392                | 13                 | 524                | 327                | 1.2              | 260              | 24              |
| ACD           | B         | Y       | 408              | 57.8                | 15.6                | 387                | 17                 | 538                | 333                | 1.3              | 241              | 24              |
| ABD           | C         | N       | 406              | 55.0                | 15.8                | 370                | 21                 | 559                | 276                | 1.1              | 133              | 22              |
| ABC           | D         | N       | 352              | 54.8                | 14.6                | 422                | 47                 | 585                | 104                | 1.7              | 254              | 29              |
| ABCD          | ABCD      | 4/4     | 401<br>(327-475) | 57.4<br>(49.8-65.0) | 15.5<br>(14.2-16.8) | 397<br>(277-568)   | 18<br>(8-42)       | 548<br>(268-1121)  | 327<br>(168-638)   | 1.4<br>(0.7-2.5) | 237<br>(183-308) | 25<br>(17-36)   |

Table S6: Comparison of PD model parameters estimated during leave-one-out validation and final PD model parameters for patient 4.

| Training Data | Test Data | Accept? | $C_{E50}$        | $E_{max}$           | $F_{01}$            | $k_{12} * 10^{-4}$ | $k_{a1} * 10^{-4}$ | $k_{a2} * 10^{-4}$ | $k_{a3} * 10^{-4}$ | $S_D * 10^{-4}$  | $S_E * 10^{-4}$  | $S_I * 10^{-4}$ |
|---------------|-----------|---------|------------------|---------------------|---------------------|--------------------|--------------------|--------------------|--------------------|------------------|------------------|-----------------|
| BCD           | A         | N       | 275              | 85.8                | 13.2                | 224                | 20                 | 245                | 61                 | 3.0              | 412              | 17              |
| ACD           | B         | Y       | 295              | 89.6                | 12.6                | 202                | 18                 | 398                | 58                 | 2.5              | 435              | 18              |
| ABD           | C         | N       | 397              | 57.4                | 12.2                | 250                | 18                 | 439                | 122                | 1.6              | 195              | 22              |
| ABC           | D         | N       | 329              | 81.9                | 13.2                | 214                | 16                 | 510                | 188                | 1.6              | 192              | 17              |
| ABCD          | ABCD      | 4/4     | 285<br>(226-344) | 84.4<br>(73.9-94.8) | 12.8<br>(11.3-14.4) | 213<br>(157-289)   | 18<br>(9-36)       | 437<br>(183-1044)  | 68<br>(42-113)     | 2.0<br>(1.0-3.8) | 415<br>(347-496) | 18<br>(13-25)   |

Table S7: Comparison of PD model parameters estimated during leave-one-out validation and final PD model parameters for patient 5.

| Training Data | Test Data | Accept? | $C_{E50}$        | $E_{max}$           | $F_{01}$            | $k_{12} * 10^{-4}$ | $k_{a1} * 10^{-4}$ | $k_{a2} * 10^{-4}$ | $k_{a3} * 10^{-4}$ | $S_D * 10^{-4}$  | $S_E * 10^{-4}$  | $S_T * 10^{-4}$ |
|---------------|-----------|---------|------------------|---------------------|---------------------|--------------------|--------------------|--------------------|--------------------|------------------|------------------|-----------------|
| BCD           | A         | Y       | 232              | 78.8                | 13.2                | 316                | 31                 | 558                | 351                | 1.3              | 436              | 42              |
| ACD           | B         | N       | 245              | 77.7                | 13.8                | 311                | 54                 | 522                | 253                | 3.5              | 239              | 36              |
| ABD           | C         | N       | 261              | 70.9                | 11.3                | 385                | 31                 | 562                | 305                | 0.7              | 526              | 62              |
| ABC           | D         | N       | 339              | 65.4                | 12.0                | 281                | 15                 | 517                | 235                | 1.1              | 229              | 31              |
| BC            | A         | Y       | 339              | 66.0                | 12.1                | 276                | 15                 | 512                | 237                | 1.1              | 222              | 30              |
| AC            | B         | Y       | 373              | 66.8                | 13.4                | 339                | 14                 | 491                | 171                | 1.3              | 161              | 26              |
| AB            | C         | Y       | 267              | 70.3                | 9.5                 | 201                | 14                 | 365                | 276                | 2.3              | 547              | 28              |
| ABC           | ABC       | 3/3     | 339<br>(251-427) | 65.4<br>(53.8-77.1) | 12.0<br>(10.6-13.5) | 281<br>(194-406)   | 15<br>(7-32)       | 517<br>(223-1201)  | 235<br>(95-586)    | 1.1<br>(0.4-2.6) | 229<br>(127-415) | 31<br>(20-47)   |

Table S8: Comparison of PD model parameters estimated during leave-one-out validation and final PD model parameters for patient 6.

| Training Data | Test Data | Accept? | $C_{E50}$        | $E_{max}$           | $F_{01}$            | $k_{12} * 10^{-4}$ | $k_{a1} * 10^{-4}$ | $k_{a2} * 10^{-4}$ | $k_{a3} * 10^{-4}$ | $S_D * 10^{-4}$  | $S_E * 10^{-4}$  | $S_T * 10^{-4}$ |
|---------------|-----------|---------|------------------|---------------------|---------------------|--------------------|--------------------|--------------------|--------------------|------------------|------------------|-----------------|
| BCD           | A         | N       | 404              | 66.0                | 15.2                | 201                | 34                 | 463                | 170                | 2.6              | 254              | 19              |
| ACD           | B         | Y       | 387              | 67.0                | 11.8                | 179                | 31                 | 404                | 180                | 3.7              | 328              | 24              |
| ABD           | C         | N       | 424              | 60.1                | 13.1                | 238                | 10                 | 353                | 74                 | 2.6              | 404              | 21              |
| ABC           | D         | Y       | 351              | 57.1                | 11.4                | 165                | 44                 | 475                | 156                | 2.8              | 384              | 22              |
| BD            | A         | Y       | 472              | 60.2                | 14.1                | 315                | 14                 | 212                | 75                 | 3.7              | 279              | 22              |
| AD            | B         | N       | 439              | 50.8                | 13.5                | 221                | 10                 | 431                | 132                | 1.3              | 194              | 20              |
| AB            | D         | Y       | 328              | 63.4                | 12.9                | 195                | 10                 | 441                | 120                | 2.6              | 461              | 19              |
| ABD           | ABD       | 3/3     | 424<br>(333-515) | 60.1<br>(46.3-74.0) | 13.1<br>(11.7-14.5) | 238<br>(172-330)   | 10<br>(4-22)       | 353<br>(102-1221)  | 74<br>(23-232)     | 2.6<br>(1.1-6.2) | 404<br>(185-882) | 21<br>(14-32)   |



Table S9: Comparison of PD model parameters estimated during leave-one-out validation and final PD model parameters for patient 7.

| Training Data | Test Data | Accept? | $C_{E50}$       | $E_{max}$           | $F_{01}$            | $k_{12} \cdot 10^{-4}$ | $k_{a1} \cdot 10^{-4}$ | $k_{a2} \cdot 10^{-4}$ | $k_{a3} \cdot 10^{-4}$ | $S_D \cdot 10^{-4}$ | $S_E \cdot 10^{-4}$ | $S_T \cdot 10^{-4}$ |
|---------------|-----------|---------|-----------------|---------------------|---------------------|------------------------|------------------------|------------------------|------------------------|---------------------|---------------------|---------------------|
| BCD           | A         | N       | 281             | 91.4                | 14.5                | 250                    | 34                     | 558                    | 32                     | 2.0                 | 321                 | 15                  |
| ACD           | B         | N       | 293             | 81.9                | 16.2                | 268                    | 189                    | 607                    | 283                    | 2.0                 | 104                 | 15                  |
| ABD           | C         | Y       | 151             | 86.9                | 12.1                | 309                    | 253                    | 791                    | 218                    | 4.7                 | 194                 | 20                  |
| ABC           | D         | Y       | 146             | 82.8                | 15.0                | 357                    | 58                     | 616                    | 113                    | 4.4                 | 143                 | 20                  |
| ABCD          | ABCD      | 4/4     | 141<br>(96-187) | 78.0<br>(68.9-87.1) | 14.2<br>(12.2-16.1) | 358<br>(252-509)       | 49<br>(23-105)         | 624<br>(319-1221)      | 178<br>(69-459)        | 4.4<br>(3.2-6.0)    | 140<br>(99-199)     | 21<br>(16-29)       |

Table S10: Comparison of PD model parameters estimated during leave-one-out validation and final PD model parameters for patient 8.

| Training Data | Test Data | Accept? | $C_{E50}$        | $E_{max}$           | $F_{01}$            | $k_{12} * 10^{-4}$ | $k_{a1} * 10^{-4}$ | $k_{a2} * 10^{-4}$ | $k_{a3} * 10^{-4}$ | $S_D * 10^{-4}$  | $S_E * 10^{-4}$  | $S_T * 10^{-4}$ |
|---------------|-----------|---------|------------------|---------------------|---------------------|--------------------|--------------------|--------------------|--------------------|------------------|------------------|-----------------|
| BCD           | A         | Y       | 362              | 39.7                | 16.8                | 429                | 273                | 546                | 280                | 0.6              | 125              | 36              |
| ACD           | B         | N       | 390              | 40.4                | 17.8                | 369                | 323                | 538                | 286                | 0.3              | 92               | 27              |
| ABD           | C         | N       | 344              | 36.1                | 16.2                | 451                | 83                 | 549                | 264                | 0.8              | 197              | 45              |
| ABC           | D         | N       | 307              | 75.3                | 13.4                | 289                | 37                 | 518                | 154                | 4.2              | 463              | 29              |
| BC            | A         | N       | 328              | 85.5                | 9.0                 | 367                | 58                 | 184                | 94                 | 13.6             | 279              | 38              |
| AC            | B         | N       | 378              | 59.1                | 16.7                | 276                | 73                 | 554                | 269                | 1.3              | 262              | 26              |
| AB            | C         | N       | 359              | 71.5                | 13.9                | 306                | 30                 | 379                | 191                | 3.5              | 197              | 27              |
| ABC           | ABC       | 3/3     | 307<br>(228-386) | 75.3<br>(61.5-89.1) | 13.4<br>(11.4-15.4) | 289<br>(197-424)   | 37<br>(18-75)      | 518<br>(203-1324)  | 154<br>(68-348)    | 4.2<br>(2.8-6.5) | 463<br>(377-569) | 29<br>(20-42)   |

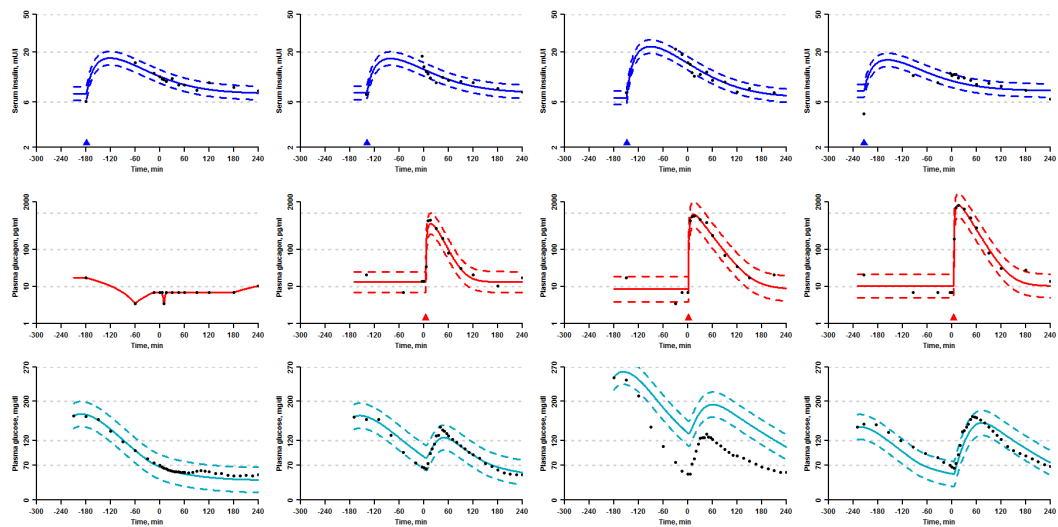

Figure S1: Data from all patient 1's visits (left to right: visit A to D) with insulin PK model fits (top row, logarithmic y-axes) and glucagon linear interpolation or PK model fits (middle row, logarithmic y-axes) both used as inputs to the glucose PD model for simulation built with data from visits A, B and D (bottom row). The dynamics during visit C are clearly different from the three other visits. The triangles indicate dose time of the insulin and glucagon boluses, respectively.

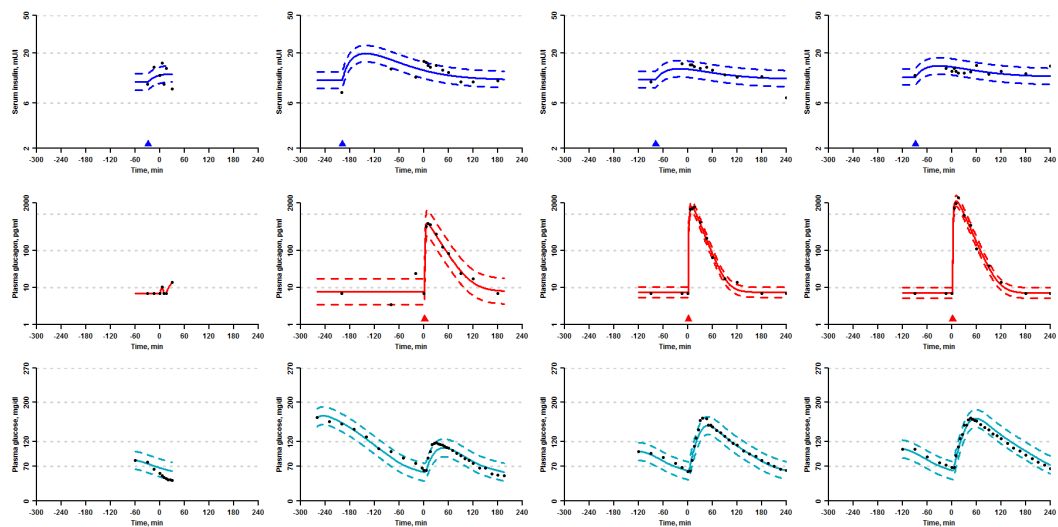

Figure S2: Data from all patient 2's visits (left to right: visit A to D) with insulin PK model fits (top row, logarithmic y-axes) and glucagon linear interpolation or PK model fits (middle row, logarithmic y-axes) both used as inputs to the glucose PD model for simulation **built with data from all four visits** (bottom row). The triangles indicate dose time of the insulin and glucagon boluses, respectively.

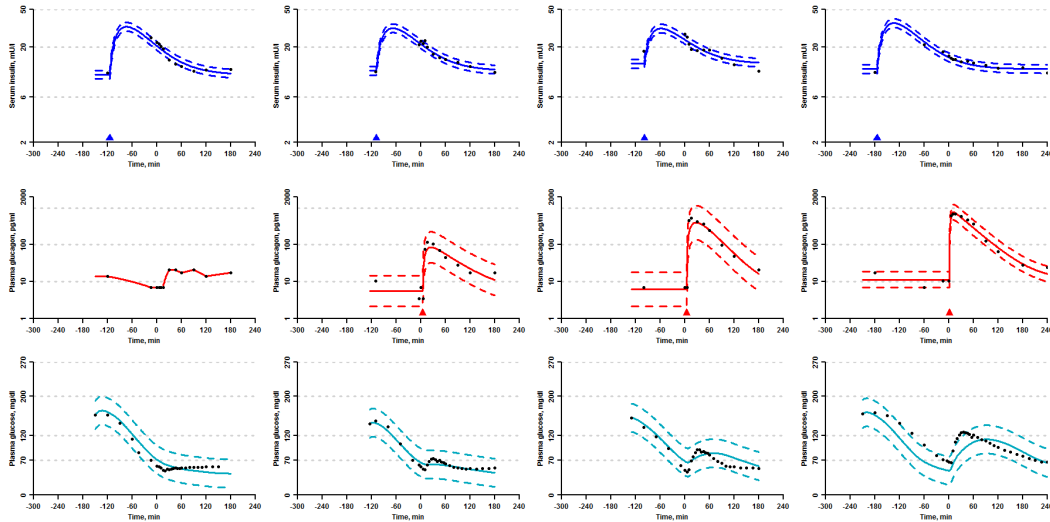

Figure S3: Data from all patient 3's visits (left to right: visit A to D) with insulin PK model fits (top row, logarithmic y-axes) and glucagon linear interpolation or PK model fits (middle row, logarithmic y-axes) both used as inputs to the glucose PD model for simulation **built with data from all four visits** (bottom row). The triangles indicate dose time of the insulin and glucagon boluses, respectively.

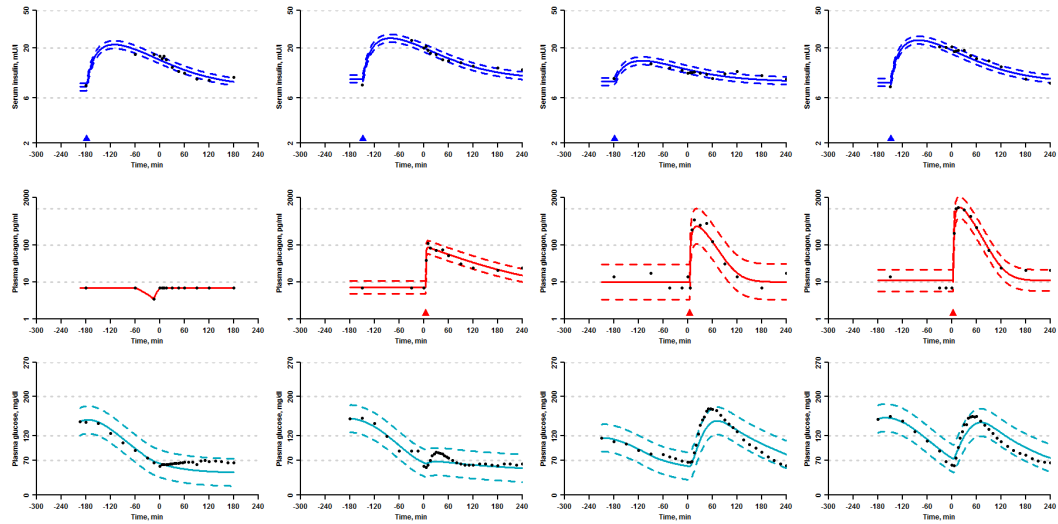

Figure S4: Data from all patient 4's visits (left to right: visit A to D) with insulin PK model fits (top row, logarithmic y-axes) and glucagon linear interpolation or PK model fits (middle row, logarithmic y-axes) both used as inputs to the glucose PD model for simulation **built with data from all four visits** (bottom row). The triangles indicate dose time of the insulin and glucagon boluses, respectively.

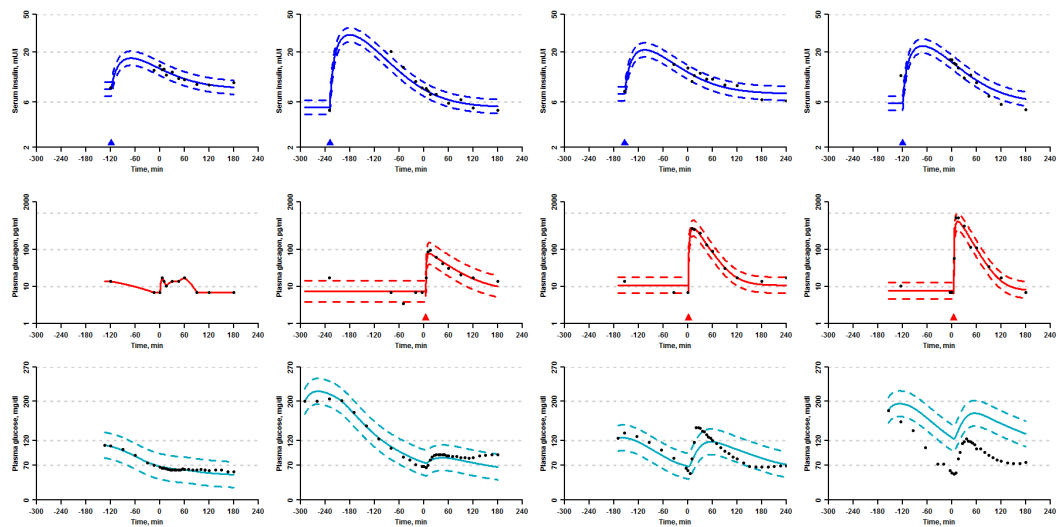

Figure S5: Data from all patient 5's visits (left to right: visit A to D) with insulin PK model fits (top row, logarithmic y-axes) and glucagon linear interpolation or PK model fits (middle row, logarithmic y-axes) both used as inputs to the glucose PD model for simulation **built with data from all four visits** (bottom row). The triangles indicate dose time of the insulin and glucagon boluses, respectively.

simulation built with data from visits A, B and C (bottom row). The dynamics during visit D are clearly different from the three other visits. The triangles indicate dose time of the insulin and glucagon boluses, respectively.

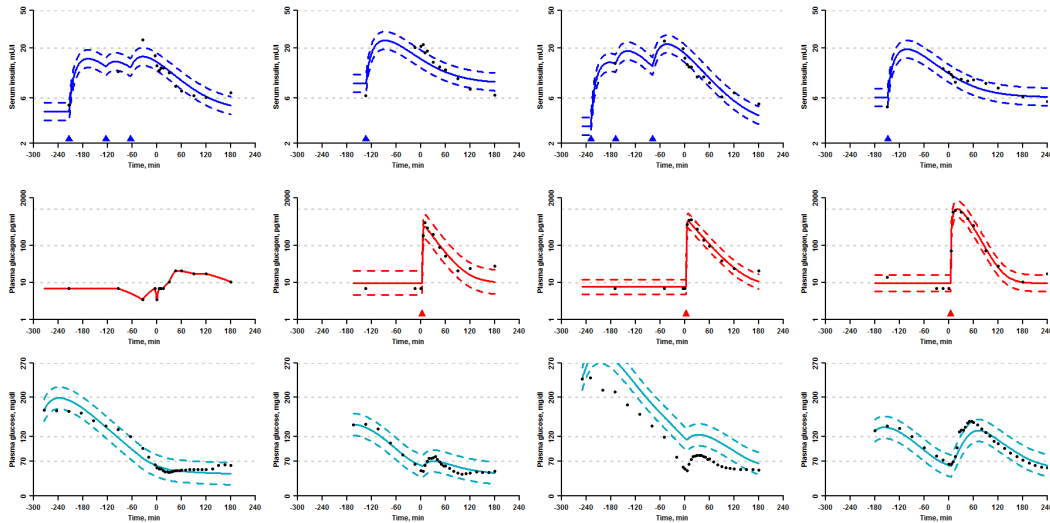

Figure S6: Data from all patient 6's visits (left to right: visit A to D) with insulin PK model fits (top row, logarithmic y-axes) and glucagon linear interpolation or PK model fits (middle row, logarithmic y-axes) both used as inputs to the glucose PD model for simulation built with data from visits A, B and D (bottom row). The dynamics during visit C are clearly different from the three other visits. The triangles indicate dose time of the insulin and glucagon boluses, respectively.

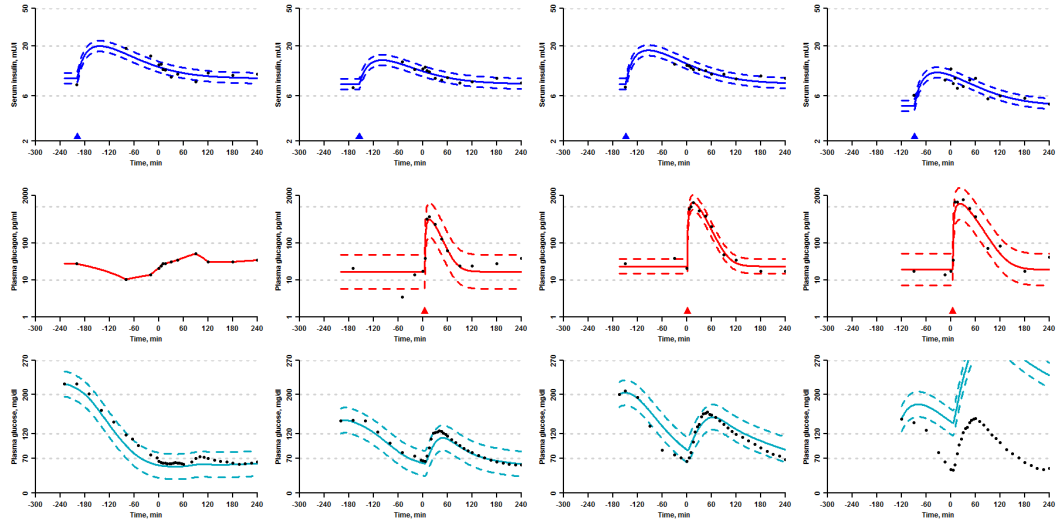

Figure S7: Data from all patient 8's visits (left to right: visit A to D) with insulin PK model fits (top row, logarithmic y-axes) and glucagon linear interpolation or PK model fits (middle row, logarithmic y-axes) both used as inputs to the glucose PD model for simulation built with data from visits A, B and C (bottom row). The dynamics during visit D are clearly different from the three other visits. The triangles indicate dose time of the insulin and glucagon boluses, respectively.
